# Supplementary material for: Thirsty? Choose Water! Behavioural interventions and water stations in secondary schools a two-by-two factorial randomised controlled trial
Source: Springer Nature journal article supplement (doi:10.1186/s12889-018-5685-1), 2018-06-25
Supplement: MOESM1 [file 15882242]

# THIRSTY? CHOOSE WATER!

**CURRICULUM, TEACHING & LEARNING**  
Thirsty? Choose Water! messaging incorporated into Year 7 curriculum and board game.

**HOME COMMUNITY PARTNERSHIPS**  
Information to parents in school newsletters and Thirsty? Choose Water website. Partnership with immunisation nurses.

**SCHOOL CULTURE ETHOS & ENVIRONMENT**  
School provides chilled water stations and canteen promotes water. Drink water message on school's social media.

**NSW** Health  
Central Coast  
Local Health District

MASTER: Thirsty Choose Water – Health Promoting Schools Framework, Version 2, 29/08/2017  
SITE SPECIFIC: Thirsty Choose Water – Health Promoting Schools Framework, Version 8, dd/mm/yyyy
